# Supplementary material
Source: PubMed Central journal article supplement (PMC3243474)
Supplement: supp_P018952_jlr.P018952-1.pdf [file supp_P018952_jlr.P018952-1.pdf]

## SUPPLEMENTARY TABLES

Supplementary Table I. Pairwise linkage disequilibrium ( $r^2$ ) between *CPT1A* polymorphisms with minor allele frequency (MAF)  $\geq 0.05$  in Yup'ik Eskimo people.

| SNP                | rs2278908 | rs2278907 | rs3019598 | P479L | rs2305508 | rs4930248 | rs3794020 | rs2924697 | rs11228372 | rs11228373 | rs3019594 | rs597316 |
|--------------------|-----------|-----------|-----------|-------|-----------|-----------|-----------|-----------|------------|------------|-----------|----------|
| rs2278908          |           | 0.67      | 0.90      | 0.09  | 0.02      | 0.25      | 0.00      | 0.00      | 0.08       | 0.12       | 0.14      | 0.03     |
| rs2278907          | 0.67      |           | 0.63      | 0.09  | 0.02      | 0.29      | 0.00      | 0.00      | 0.08       | 0.14       | 0.14      | 0.04     |
| rs3019598          | 0.90      | 0.63      |           | 0.08  | 0.02      | 0.27      | 0.00      | 0.00      | 0.09       | 0.13       | 0.13      | 0.06     |
| P479L (rs80356779) | 0.09      | 0.09      | 0.08      |       | 0.00      | 0.25      | 0.07      | 0.00      | 0.44       | 0.58       | 0.61      | 0.09     |
| rs2305508          | 0.02      | 0.02      | 0.02      | 0.00  |           | 0.08      | 0.75      | 0.00      | 0.00       | 0.00       | 0.00      | 0.01     |
| rs4930248          | 0.25      | 0.29      | 0.27      | 0.25  | 0.08      |           | 0.01      | 0.00      | 0.25       | 0.29       | 0.28      | 0.01     |
| rs3794020          | 0.00      | 0.00      | 0.00      | 0.07  | 0.75      | 0.01      |           | 0.00      | 0.02       | 0.04       | 0.04      | 0.01     |
| rs2924697          | 0.00      | 0.00      | 0.00      | 0.00  | 0.00      | 0.00      | 0.00      |           | 0.01       | 0.01       | 0.01      | 0.01     |
| rs11228372         | 0.08      | 0.08      | 0.09      | 0.44  | 0.00      | 0.25      | 0.02      | 0.01      |            | 0.74       | 0.74      | 0.00     |
| rs11228373         | 0.12      | 0.14      | 0.13      | 0.58  | 0.00      | 0.29      | 0.04      | 0.01      | 0.74       |            | 0.95      | 0.16     |
| rs3019594          | 0.14      | 0.14      | 0.13      | 0.61  | 0.00      | 0.28      | 0.04      | 0.01      | 0.74       | 0.95       |           | 0.16     |
| rs597316           | 0.03      | 0.04      | 0.06      | 0.09  | 0.01      | 0.01      | 0.01      | 0.01      | 0.00       | 0.16       | 0.16      |          |

Pairwise linkage disequilibrium ( $r^2$ ) was calculated using the hapfreq command in FBAT (42).

**Supplementary Table II. Association of *CPT1A* SNPs with obesity-related traits with correction for BMI<sup>1,2</sup>.**

| <b>SNP</b>                | <b>Chol</b>                               | <b>HDL</b>                                    | <b>ApoA1</b>                                      |
|---------------------------|-------------------------------------------|-----------------------------------------------|---------------------------------------------------|
| <b>rs2278908</b>          | 0.0738<br>( $\beta=-1.0$ , SE=0.5)        | <b>0.0007</b><br>( $\beta=-2.1$ , SE=0.6)     | 0.04843<br>( $\beta=-1.5$ , SE=0.6)               |
| <b>rs2278907</b>          | 0.1294<br>( $\beta=-0.6$ , SE=0.4)        | 0.0542<br>( $\beta=-1.0$ , SE=1.0)            | 0.4939<br>( $\beta=-0.4$ , SE=0.6)                |
| <b>rs3019598</b>          | 0.125<br>( $\beta=-0.9$ , SE=0.6)         | <b>0.0009</b><br>( $\beta=-2.1$ , SE=0.6)     | 0.1886<br>( $\beta=-1.0$ , SE=0.8)                |
| <b>P479L (rs80356779)</b> | 0.0489<br>( $\beta=-0.4$ , SE=0.2)        | <b>0.0023</b><br>( $\beta=-0.7$ , SE=0.2)     | 0.0526<br>( $\beta=-0.6$ , SE=0.3)                |
| <b>rs2305508</b>          | 0.0247<br>( $\beta=-0.4$ , SE=0.2)        | 0.628<br>( $\beta=0.1$ , SE=0.2)              | 0.0453<br>( $\beta=0.5$ , SE=0.2)                 |
| <b>rs4930248</b>          | 0.0743<br>( $\beta=-0.6$ , SE=0.3)        | 0.4877<br>( $\beta=-0.3$ , SE=0.4)            | 0.5947<br><b>(<math>\beta=0.3</math>, SE=0.5)</b> |
| <b>rs3794020</b>          | 0.5055<br>( $\beta=-0.1$ , SE=0.2)        | 0.2888<br>( $\beta=0.2$ , SE=0.2)             | 0.0182<br>( $\beta=0.6$ , SE=0.3)                 |
| <b>rs11228372</b>         | 0.0089<br>( $\beta=-0.8$ , SE=0.3)        | 0.0097<br>( $\beta=-0.9$ , SE=0.3)            | 0.0544<br>( $\beta=-0.8$ , SE=0.4)                |
| <b>rs11228373</b>         | <b>0.0045</b><br>( $\beta=-0.7$ , SE=0.2) | <b>&lt;0.0001</b><br>( $\beta=-1.1$ , SE=0.3) | <b>0.0025</b><br>( $\beta=-1.0$ , SE=0.3)         |
| <b>rs3019594</b>          | <b>0.0018</b><br>( $\beta=-0.8$ , SE=0.2) | <b>&lt;0.0001</b><br>( $\beta=-1.1$ , SE=0.3) | <b>0.0036</b><br>( $\beta=-1.0$ , SE=0.4)         |
| <b>rs597316</b>           | 0.2417<br>( $\beta=-0.7$ , SE=0.6)        | <b>0.0023</b><br>( $\beta=-1.9$ , SE=0.6)     | 0.049<br>( $\beta=-1.5$ , SE=0.8)                 |

<sup>1</sup>Association of *CPT1A* SNPs in a linear regression model adjusted for age, sex, community membership, n-3 PUFA intake, and BMI. Estimates of effect size ( $\beta$ ) are reported using transformed phenotypes.

<sup>2</sup>Results are significant at  $p < 0.0063$  and highlighted in bold. Multiple test correction for 8 tests for a phenotype was estimated using the spectral decomposition of LD matrix (50). Total cholesterol (Chol), high-density lipoprotein (HDL), and apolipoprotein A-I (ApoA1).

**Supplementary Table III. Interaction of *CPT1A* SNPs and n-3 PUFA intake on obesity-related traits<sup>1</sup>.**

| SNP                       | Obesity Measures |        |        |        |        | Lipid Measures |               |               |        |        |        |
|---------------------------|------------------|--------|--------|--------|--------|----------------|---------------|---------------|--------|--------|--------|
|                           | BMI              | PBF    | HC     | ThC    | WC     | Chol           | HDL           | ApoA1         | LDL    | VLDL   | TG     |
| rs2278908                 | 0.6997           | 0.5860 | 0.5768 | 0.3308 | 0.7987 | 0.4877         | 0.5265        | 0.7858        | 0.7161 | 0.3411 | 0.8915 |
| rs2278907                 | 0.9279           | 0.8310 | 0.5648 | 0.5485 | 0.7775 | 0.1824         | 0.8763        | 0.1738        | 0.3854 | 0.2560 | 0.5888 |
| rs3019598                 | 0.6398           | 0.5636 | 0.6959 | 0.4958 | 0.7318 | 0.5335         | 0.4480        | 0.9069        | 0.7364 | 0.1764 | 0.6600 |
| <b>P479L (rs80356779)</b> | 0.1717           | 0.1691 | 0.4205 | 0.0149 | 0.2248 | 0.6630         | 0.9256        | 0.4393        | 0.6964 | 0.2751 | 0.2157 |
| rs2305508                 | 0.8947           | 0.8565 | 0.5823 | 0.8936 | 0.8734 | 0.4015         | 0.0154        | <b>0.0062</b> | 0.5506 | 0.3590 | 0.3774 |
| rs4930248                 | 0.1699           | 0.4673 | 0.0818 | 0.0330 | 0.1034 | 0.8452         | 0.9753        | 0.8425        | 0.7743 | 0.7788 | 0.9990 |
| rs3794020                 | 0.6887           | 0.6889 | 0.7234 | 0.4303 | 0.4022 | 0.3630         | <b>0.0032</b> | <b>0.0023</b> | 0.2954 | 0.2715 | 0.2295 |
| rs11228372                | 0.4352           | 0.5819 | 0.5190 | 0.1252 | 0.8422 | 0.6257         | 0.7445        | 0.3664        | 0.3263 | 0.9185 | 0.9420 |
| rs11228373                | 0.4592           | 0.6869 | 0.3925 | 0.2150 | 0.8676 | 0.5157         | 0.9752        | 0.6635        | 0.3784 | 0.9065 | 0.8485 |
| rs3019594                 | 0.2141           | 0.4457 | 0.2387 | 0.0885 | 0.5671 | 0.5007         | 0.7437        | 0.2070        | 0.3959 | 0.9058 | 0.9589 |
| rs597316                  | 0.7939           | 0.9907 | 0.5994 | 0.7873 | 0.9745 | 0.3530         | 0.2152        | 0.2169        | 0.6192 | 0.1509 | 0.3037 |

<sup>1</sup>Results are significant at  $p < 0.0063$  and highlighted in bold. Multiple test correction for 8 tests for a phenotype was estimated using the spectral decomposition of LD matrix (50). Body mass index (BMI), percent body fat (PBF), hip circumference (HC), thigh circumference (ThC), waist circumference (WC), total cholesterol (Chol), high-density lipoprotein (HDL), apolipoprotein A-I (ApoA1), low-density lipoprotein (LDL), very-low density lipoprotein (VLDL), triglycerides (TG).
